# Supplementary material for: Sn2B7O12F with a 2∞[B14O24]6− layer constructed from the unprecedented [B7O16]11− fundamental building block
Source: Royal Society of Chemistry journal article supplement (doi:10.1039/c9qi00120d), 2019-01-01
Supplement: c9qi00120d1.pdf [file c9qi00120d1.pdf]

### Electronic Supplementary Information

## **Sn<sub>2</sub>B<sub>7</sub>O<sub>12</sub>F with a $\frac{2}{\infty}$ [B<sub>14</sub>O<sub>24</sub>]<sup>6-</sup> layer constructed from the unprecedented [B<sub>7</sub>O<sub>16</sub>]<sup>11-</sup> fundamental building block**

Zixiu Lu,<sup>a,b,#</sup> Fangfang Zhang,<sup>a,b,#</sup> Abudukadi Tudi,<sup>a,b</sup> Zhizhong Zhang,<sup>a,b</sup>

Zhihua Yang<sup>a,b</sup> and Shilie Pan<sup>a,b,\*</sup>

<sup>a</sup>CAS Key Laboratory of Functional Materials and Devices for Special Environments;  
Xinjiang Technical Institute of Physics & Chemistry, CAS; Xinjiang Key Laboratory  
of Electronic Information Materials and Devices, 40-1 South Beijing Road, Urumqi  
830011, China.

<sup>b</sup>Center of Materials Science and Optoelectronics Engineering, University of Chinese  
Academy of Sciences, Beijing 100049, China.

<sup>#</sup>These authors contributed equally to this work.

\*Corresponding author: slpan@ms.xjb.ac.cn.

**Table S1.** Atomic coordinates ( $\times 10^4$ ) and equivalent isotropic displacement parameters ( $\text{\AA}^2 \times 10^3$ ) for  $\text{Sn}_2\text{B}_7\text{O}_{12}\text{F}$ .  $U(\text{eq})$  is defined as one third of the trace of the orthogonalized  $U_{ij}$  tensor.

| Atoms  | $x$     | $y$     | $z$     | $U(\text{eq})$ |
|--------|---------|---------|---------|----------------|
| Sn (1) | 958(1)  | 3317(1) | 9947(1) | 12(1)          |
| Sn (2) | 1345(1) | 5698(1) | 8379(1) | 13(1)          |
| B (1)  | 4052(3) | 6665(4) | 8858(2) | 10(1)          |
| B (2)  | 706(3)  | 9788(4) | 9248(2) | 11(1)          |
| B (3)  | 4076(3) | 3799(4) | 8594(2) | 12(1)          |
| B (4)  | 2783(3) | 2632(4) | 7777(2) | 11(1)          |
| B (5)  | 2999(3) | 8727(4) | 9424(2) | 11(1)          |
| B (6)  | 5678(4) | 7194(4) | 8192(2) | 13(1)          |
| B (7)  | 3198(4) | 5043(4) | 7214(2) | 13(1)          |
| O (1)  | 3484(2) | 5249(3) | 8570(1) | 10(1)          |
| O (2)  | 4655(2) | 7684(3) | 8458(1) | 12(1)          |
| O (3)  | 60(2)   | 1177(3) | 9296(1) | 12(1)          |
| O (4)  | 1919(2) | 9656(3) | 9500(1) | 15(1)          |
| O (5)  | 3678(2) | 2602(3) | 8272(1) | 17(1)          |
| O (6)  | 122(2)  | 8553(3) | 8975(1) | 13(1)          |
| O (7)  | 5928(3) | 5627(3) | 8148(1) | 26(1)          |
| O (8)  | 2958(2) | 7461(3) | 9082(1) | 12(1)          |
| O (9)  | -916(2) | 4207(3) | 9727(1) | 18(1)          |
| O (10) | 6503(2) | 8238(2) | 7962(1) | 10(1)          |
| O (11) | 3259(2) | 3518(3) | 7324(1) | 16(1)          |
| O (12) | 2357(2) | 6037(2) | 7441(1) | 9(1)           |
| F (1)  | 1533(2) | 4266(2) | 9206(1) | 26(1)          |

**Table S2.** Selected bond lengths (Å) and angles (°) for Sn<sub>2</sub>B<sub>7</sub>O<sub>12</sub>F.

|                     |           |                      |          |
|---------------------|-----------|----------------------|----------|
| Sn(1)-F(1)          | 2.063(2)  | B(3)-O(5)            | 1.335(5) |
| Sn(1)-O(9)          | 2.132(3)  | B(3)-O(6)#5          | 1.389(4) |
| Sn(1)-O(9)#1        | 2.273(3)  | B(3)-O(1)            | 1.395(4) |
| Sn(1)-O(3)          | 2.549(3)  | B(4)-O(11)           | 1.432(4) |
| Sn(2)-O(1)          | 2.279(3)  | B(4)-O(5)            | 1.456(4) |
| Sn(2)-F(1)          | 2.318(3)  | B(4)-O(12)#6         | 1.475(4) |
| Sn(2)-O(10)#2       | 2.352(3)  | B(4)-O(10)#2         | 1.522(4) |
| Sn(2)-O(12)         | 2.539(3)  | B(5)-O(8)            | 1.361(4) |
| B(1)-O(2)           | 1.464(4)  | B(5)-O(9)#3          | 1.366(4) |
| B(1)-O(3)#3         | 1.493(4)  | B(5)-O(4)            | 1.402(4) |
| B(1)-O(1)           | 1.503(4)  | B(6)-O(2)            | 1.339(4) |
| B(1)-O(8)           | 1.458(4)  | B(6)-O(10)           | 1.382(4) |
| B(2)-O(4)           | 1.369(4)  | B(6)-O(7)            | 1.383(5) |
| B(2)-O(6)           | 1.370(4)  | B(7)-O(11)           | 1.342(4) |
| B(2)-O(3)#4         | 1.383(4)  | B(7)-O(12)           | 1.361(4) |
|                     |           | B(7)-O(7)#7          | 1.385(4) |
| F(1)-Sn(1)-O(9)     | 87.57(10) | O(6)-B(2)-O(3)#4     | 120.6(3) |
| F(1)-Sn(1)-O(9)#1   | 86.00(10) | O(5)-B(3)-O(6)#5     | 117.3(3) |
| O(9)-Sn(1)-O(9)#1   | 73.03(10) | O(5)-B(3)-O(1)       | 123.3(3) |
| F(1)-Sn(1)-O(3)     | 83.40(10) | O(6)#5-B(3)-O(1)     | 119.4(3) |
| O(9)-Sn(1)-O(3)     | 79.41(9)  | O(11)-B(4)-O(5)      | 112.5(3) |
| O(9)#1-Sn(1)-O(3)   | 150.82(8) | O(11)-B(4)-O(12)#6   | 105.5(3) |
| O(1)-Sn(2)-F(1)     | 73.19(8)  | O(5)-B(4)-O(12)#6    | 108.1(3) |
| O(1)-Sn(2)-O(10)#2  | 80.66(8)  | O(11)-B(4)-O(10)#2   | 112.5(3) |
| F(1)-Sn(2)-O(10)#2  | 82.64(10) | O(5)-B(4)-O(10)#2    | 107.6(3) |
| O(1)-Sn(2)-O(12)    | 74.97(8)  | O(12)#6-B(4)-O(10)#2 | 110.6(3) |
| F(1)-Sn(2)-O(12)    | 141.90(8) | O(8)-B(5)-O(9)#3     | 123.5(3) |
| O(10)#2-Sn(2)-O(12) | 71.99(8)  | O(8)-B(5)-O(4)       | 122.7(3) |
| O(8)-B(1)-O(2)      | 109.3(3)  | O(9)#3-B(5)-O(4)     | 113.7(3) |
| O(8)-B(1)-O(3)#3    | 114.2(3)  | O(2)-B(6)-O(10)      | 120.9(3) |
| O(2)-B(1)-O(3)#3    | 108.1(3)  | O(2)-B(6)-O(7)       | 120.3(3) |
| O(8)-B(1)-O(1)      | 104.8(3)  | O(10)-B(6)-O(7)      | 118.8(3) |
| O(2)-B(1)-O(1)      | 111.4(3)  | O(11)-B(7)-O(12)     | 124.4(3) |
| O(3)#3-B(1)-O(1)    | 109.1(3)  | O(11)-B(7)-O(7)#7    | 116.9(3) |
| O(4)-B(2)-O(6)      | 120.9(3)  | O(12)-B(7)-O(7)#7    | 118.7(3) |
| O(4)-B(2)-O(3)#4    | 118.5(3)  |                      |          |

Symmetry transformations used to generate equivalent atoms:

|     |                             |    |                     |    |                             |
|-----|-----------------------------|----|---------------------|----|-----------------------------|
| #1  | -x, -y + 1, -z + 2          | #2 | x - 1/2, y - 1/2, z | #3 | x + 1/2, y + 1/2, z         |
| #4  | x, y + 1, z                 | #5 | x + 1/2, y - 1/2, z | #6 | -x + 1/2, y - 1/2, -z + 3/2 |
| #7  | -x + 1, y, -z + 3/2         | #8 | x, y - 1, z         | #9 | x - 1/2, y + 1/2, z         |
| #10 | -x + 1/2, y + 1/2, -z + 3/2 |    |                     |    |                             |

**Table S3.** Configurations and the degree of the polymerization (R) of the FBBs with seven boron atoms.

| FBB Configurations                                                              | R        | Representative examples                                                    |
|---------------------------------------------------------------------------------|----------|----------------------------------------------------------------------------|
| 7: $\infty^3[\langle 2\Delta T \rangle + \langle \Delta 2T \rangle + \Delta]$   | 3        | $\text{Li}_3\text{B}_7\text{O}_{12}^1$                                     |
| 7: $\infty^3[\langle 6T \rangle^B + \Delta]$                                    | 3        | $\text{Fe}_3\text{B}_7\text{O}_{13}\text{Cl}^2$                            |
| 7: $\infty^3[\langle 3\Delta 3T \rangle^B + \Delta]$                            | 3        | $\text{Co}_3\text{B}_7\text{O}_{13}\text{F}(\text{OH})^3$                  |
| <b>7: <math>\infty^2[\Delta + \langle 2\Delta T \rangle + 2\Delta T]</math></b> | <b>2</b> | <b><math>\text{Sn}_2\text{B}_7\text{O}_{12}\text{F}</math></b>             |
| <b>7: <math>\infty^2[\langle T2\Delta \rangle + T\Delta + T\Delta]</math></b>   | <b>2</b> | <b><math>\text{AgSrB}_7\text{O}_{12}</math></b>                            |
| 7: $[\Delta \Delta  + \langle \Delta 2T \rangle +  \Delta \Delta ]$             | 0        | $\text{K}_3\text{PtB}_7\text{O}_{11}(\text{OH})_6(\text{H}_2\text{O})_3^4$ |
| 7: $[T + \langle 2\Delta 3T \rangle^8 + T]$                                     | 0        | $\text{NaBa}_3\text{Si}_2\text{B}_7\text{O}_{16}(\text{OH})_4^5$           |
| 7: $[5\Delta 2T]^{2-8}$                                                         | 0        | $\text{NaMg}_2\text{Ba}_7\text{B}_{14}\text{O}_{28}\text{F}_5^6$           |

**Table S4.** Bonding electron density difference ( $\Delta\rho$ ) of different units calculated by the REDA method and the density of different groups in the unit cell.

| Units                                                | $\Delta\rho$ | ( $\times 10^{-3}/\text{\AA}^3$ ) |
|------------------------------------------------------|--------------|-----------------------------------|
| $[\text{BO}_3]^{3-}$                                 | 12.6566      | 18.7793                           |
| $[\text{BO}_4]^{5-}$                                 | 0.0007       | 7.5117                            |
| $[\text{SnO}_3\text{F}]^{5-}$                        | 0.0012       | 5.6338                            |
| $[\text{SnO}_4\text{F}]^{7-}$                        | 0.0099       | 3.7559                            |
| $[\text{B}_{14}\text{O}_{24}]^{6-}$ layer            | 12.6573      | /                                 |
| $[\text{Sn}_4\text{O}_{12}\text{F}_2]^{18-}$ cluster | 0.0111       | /                                 |

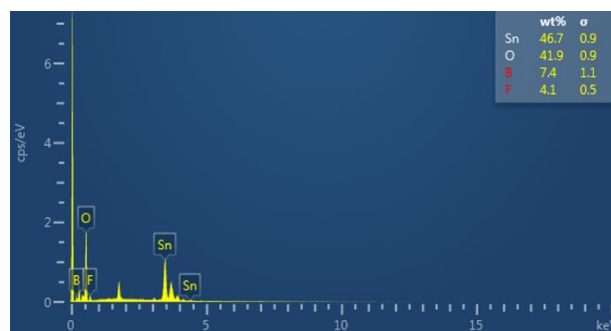

**Figure S1.** EDS of the  $\text{Sn}_2\text{B}_7\text{O}_{12}\text{F}$  crystal.

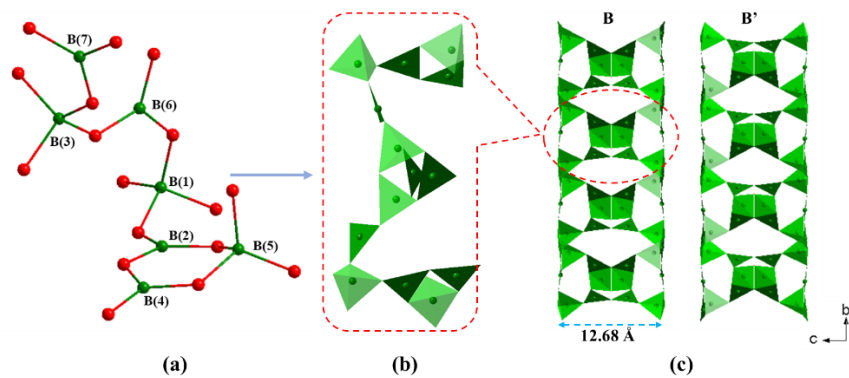

**Figure S2.** (a)  $[\text{B}_7\text{O}_{17}]^{13-}$  FBB of  $\text{AgSrB}_7\text{O}_{12}$ . (b) Chain-like cluster  $[\text{B}_{14}\text{O}_{31}]^{20-}$  in  $\text{AgSrB}_7\text{O}_{12}$ . (c)  $\frac{2}{\infty}[\text{B}_{14}\text{O}_{24}]^{6-}$  layer of  $\text{AgSrB}_7\text{O}_{12}$ .

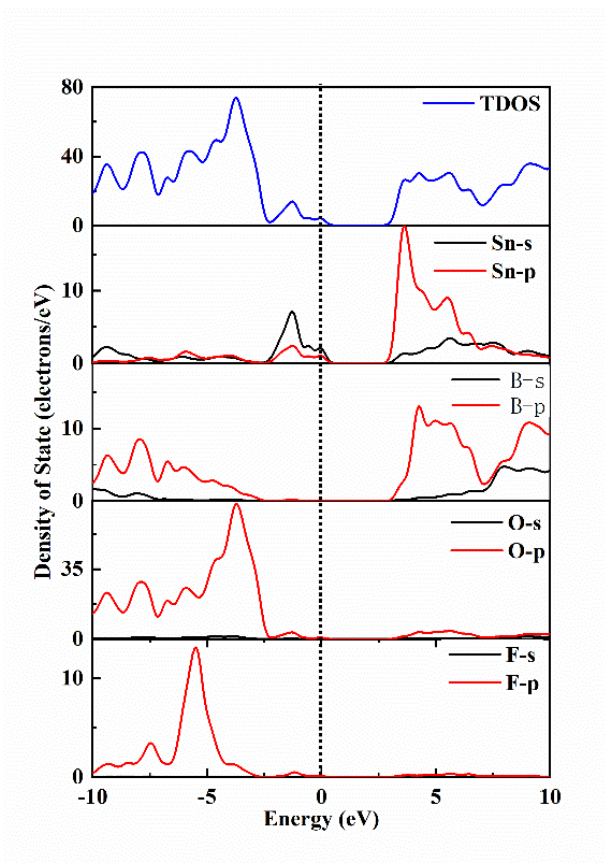

**Figure S3.** PDOS of  $\text{Sn}_2\text{B}_7\text{O}_{12}\text{F}$



## References

1. A. D. Jiang, S. R. Lei, Q. Z. Huang, T. B. Chen, D. Ke, *Acta Crystallogr. C*, 1991, **46**, 1999.
2. M. E. Mendoza-Alvarez, K. Yvon, W. Depmeier, H. Schmid, *Acta Crystallogr. C*, 1985, **41**, 1551.
3. G. Berset, K. Yvon, W. Depmeier, R. Boutellier, H. Schmid, *Ferroelectrics*, 1984, **56**, 13.
4. H. Behm, *Acta Crystallogr. C*, 1988, **44**, 1348.
5. S. Ghose, C. Wan, H. H. Ulbrich, *Acta Crystallogr. B*, 1976, **32**, 824.
6. M. Mutailipu, M. Zhang, Y. N. Chen, X. Q. Lu, S.L. Pan, *Dalton Trans.*, 2017, **46**, 4923.
